# Supplementary material for: Impact of structural polymorphism for the Helicobacter pylori CagA oncoprotein on binding to polarity-regulating kinase PAR1b
Source: Sci Rep. 2016 Jul 22;6:30031. doi: 10.1038/srep30031 (PMC4957108; doi:10.1038/srep30031)
Supplement: Supplementary Information [file srep30031-s1.pdf]

## **Supplementary Information**

### **Impact of structural polymorphism for the *Helicobacter pylori* CagA oncoprotein on binding to polarity-regulating kinase PAR1b**

Hiroko Nishikawa, Takeru Hayashi, Fumio Arisaka, Toshiya Senda & Masanori Hatakeyama

## **Supplementary Methods**

### **Bacterial expression vector for full-length PAR1b**

Human *PAR1b* (GenBank: NM\_017490.3) was tagged at the 3' end with the 6xHis tag sequence by PCR and inserted into pGEX-6P-2 (GE Healthcare).

### **Full-length PAR1b expression and purification**

Protein expression and purification were performed as previously described<sup>1</sup> with a few modifications. High salt lysis buffer (PBS, 2% (v/v) Tween 20, 1% (v/v) Triton X-100, 1 mM EDTA, 1 mM DTT, 350 mM NaCl) was used for the initial lysis of cells. Cleared lysate was mixed with Ni Sepharose excel beads (GE Healthcare) and eluted in high salt lysis buffer + 500 mM imidazole, prior to the GST purification step. The final incubation with PreScission Protease (GE Healthcare) was performed in 50 mM Tris-Cl, pH7.5, 500 mM NaCl, 1 mM EGTA, 1 mM DTT.

### ***Supplementary Reference***

1. Kojima, Y. et al. Suppression of tubulin polymerization by the LKB1-microtubule-associated protein/microtubule affinity-regulating kinase signaling. *J. Biol. Chem.* **282**, 23532–23540 (2007).

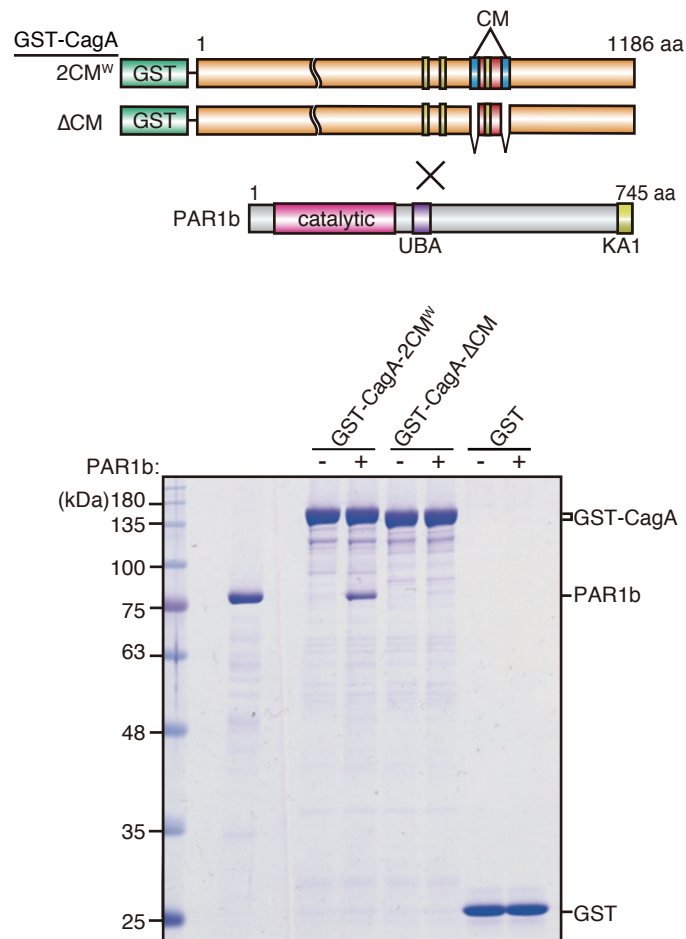

**Supplementary Figure S1. CM-dependent interaction between CagA and full-length PAR1b.** Schematic diagram of GST-CagA-2CM<sup>W</sup>, GST-CagA-ΔCM and PAR1b used in this pull-down assay (*top*). GST pull-down was performed in GST binding buffer + 0.01 % Triton X-100. Samples were resolved on an SDS-PAGE gel and stained with CBB (*bottom*).

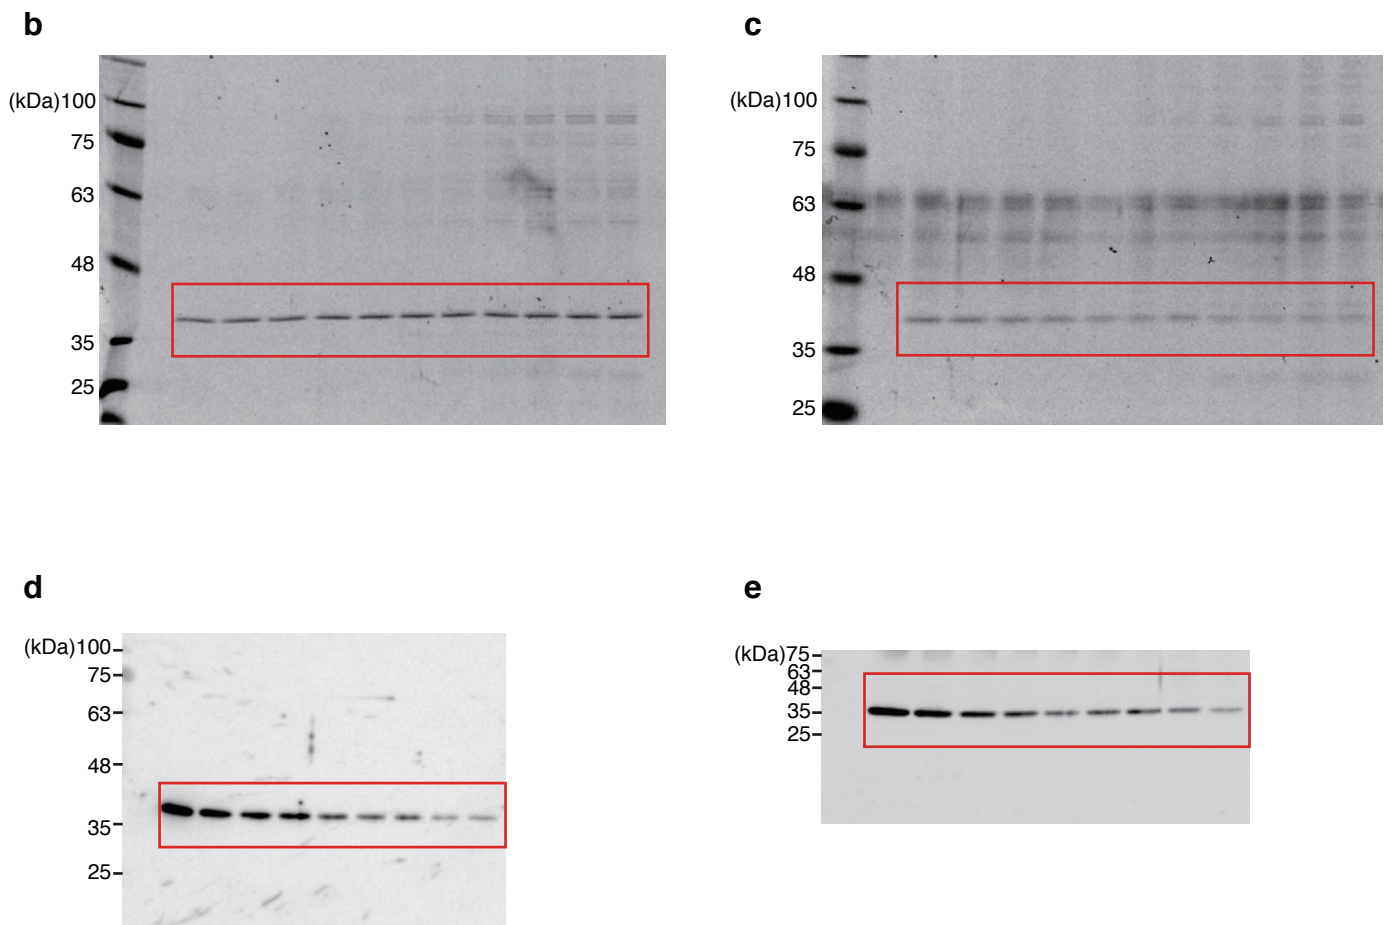

**Supplementary Figure S2. Full-length gels and blots for Figure 3b-e. (b&c)**

Full-length CBB stained gels. **(d&e)** Full-length immunoblots detected by  $\alpha$ -FLAG antibody. Red squares indicate where the images were cropped.

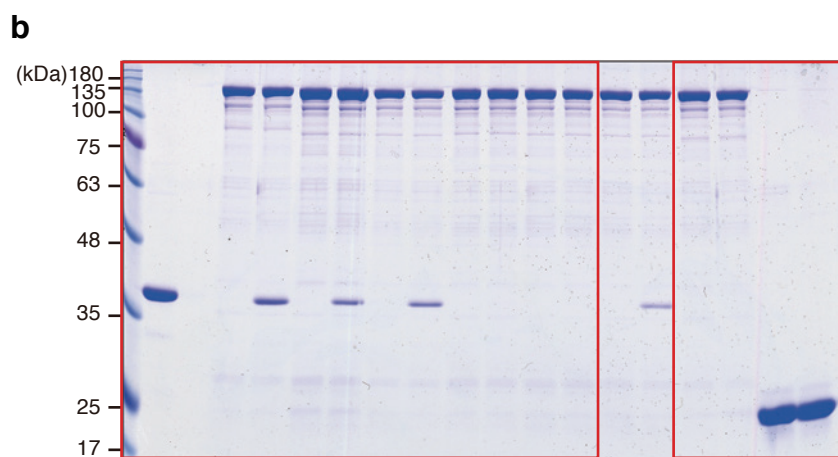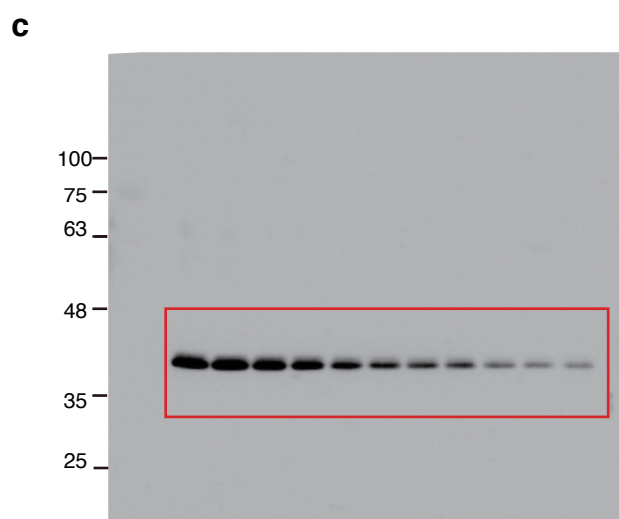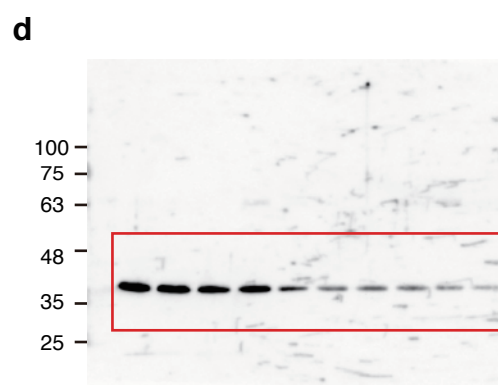

**Supplementary Figure S3. Full-length gels and blots for Figure 4b-d. (b)**

Full-length CBB stained gel. **(c&d)** Full-length immunoblots detected by  $\alpha$ -FLAG antibody. Red boxes indicate where the images were cropped.

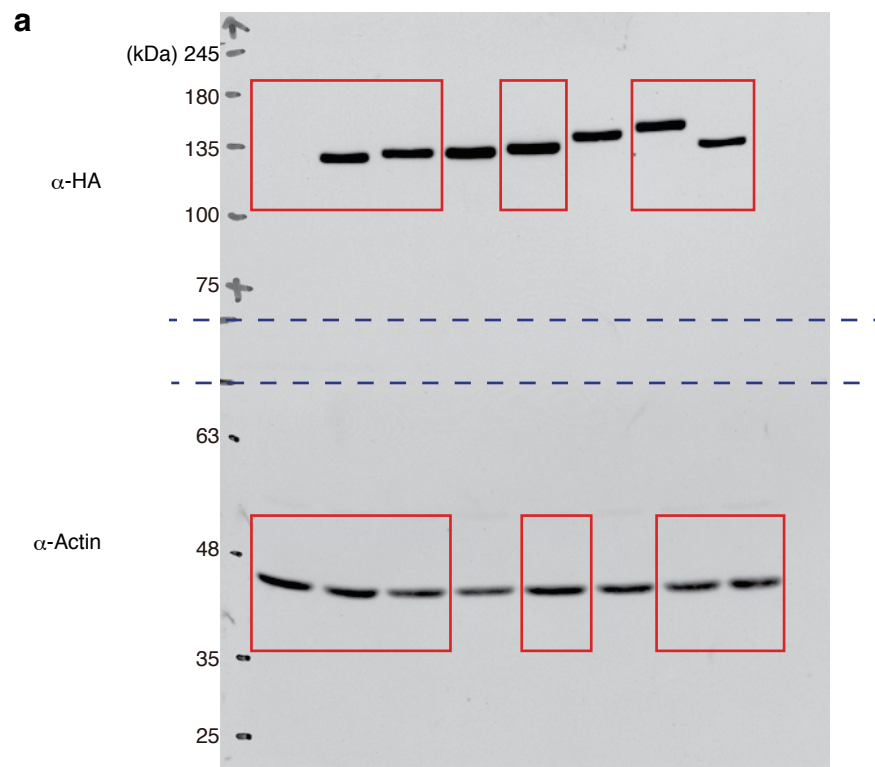

**Supplementary Figure S4. Full-length blot for Figure 5a.** Blue dashed lines indicate where the membrane was cut and probed with different antibodies. Red squares indicate where the images were cropped.

**a**

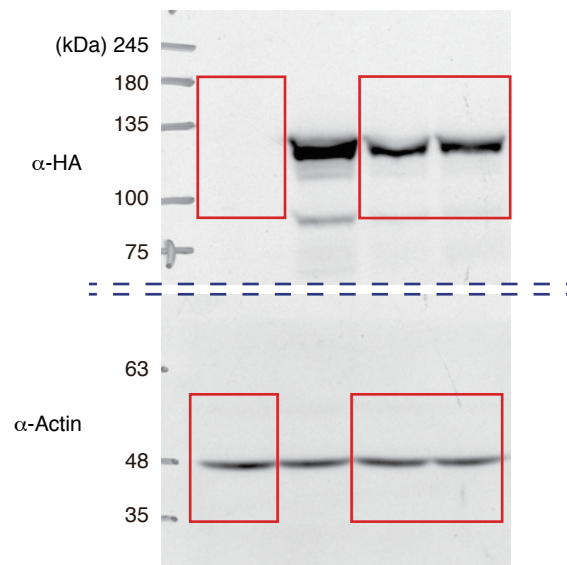

**Supplementary Figure S5. Full-length blot for Figure 6a.** Blue dashed lines indicate where the membrane was cut and probed with different antibodies. Red squares indicate where the images were cropped.
